# Supplementary material for: Sonographic Surveillance and Perinatal Outcomes Among Pregnancies with Periviable Fetal Growth Restriction
Source: Research Square preprint supplement (doi:10.21203/rs.3.rs-5769809/v1), 2025-01-23
Supplement: Supplementary file 1 [file 2f45eadc45129c2958c0efce.docx]

| **Supplementary Table 2**. Univariate and multivariate binomial logistic regression model assessing the interactions between maternal CHTN and history of IUFD on the primary and secondary outcomes. | | | | |
| --- | --- | --- | --- | --- |
| **PRIMARY OUTCOME: PERINATAL DEATH** | | | | |
|  | **OR (95% CI)** | ***p* value** | **aOR (95% CI)** | ***p* value** |
| Weekly surveillance |  |  | 2.02 (0.31, 2.06) | 0.69 |
| CHTN | 2.4 (0.90, 5.81) | 0.07 | 2.5 (0.91, 6.32) | 0.06 |
| History of IUFD | 2.2 (0.32, 9.40) | 0.34 | 2.4 (0.33, 10.87) | 0.31 |
| **SECONDARY OUTCOME: OBSTETRIC ADVERSE OUTCOME COMPOSITE** | | | | |
| Weekly surveillance |  |  | 2.0 (0.3, 2.06) | **0.02** |
| CHTN | 5.6 (2.60, 13.72) | **< 0.05** | 5.1 (0.91, 6.32) | **< 0.05** |
| History of IUFD | 4.1 (0.99, 27.42) | 0.08 | 3.6 (0.33, 10.87) | 0.12 |
| **SECONDARY OUTCOME: NEONATAL ADVERSE OUTCOME COMPOSITE** | | | | |
| Weekly surveillance |  |  | 3.3 (0.31, 2.1) | **< 0.05** |
| CHTN | 4.7 (2.23, 10.61) | **< 0.05** | 4.2 (0.91, 6.32) | **< 0.05** |
| History of IUFD | 4.8 (1.07, 33.28) | 0.06 | 3.8 (0.33, 10.87) | 0.13 |
| *Abbreviations: IUFD (intrauterine fetal demise), CHTN (pre-existing hypertension), OR (odds ratio), CI (confidence interval), aOR (adjusted odds ratio).* | | | | |
