# Supplementary material for: Sonographic Surveillance and Perinatal Outcomes Among Pregnancies with Periviable Fetal Growth Restriction
Source: Research Square preprint supplement (doi:10.21203/rs.3.rs-5769809/v1), 2025-01-23
Supplement: Supplementary file 2 [file 46ff139d856afcd7b706e2d7.docx]

| **Supplementary Table 1.** Neonatal characteristics among all pregnancies that resulted in livebirth. | | | | |
| --- | --- | --- | --- | --- |
|  | **All**  **(n=208)** | **Surveillance**  **(n=74, 35.6%)** | **Serial growth**  **(n=134, 64.4%)** | ***p* value** |
| **Female sex** | 137 (65.8%) | 48 (64.9%) | 89 (66.4%) | 0.82 |
| **Birthweight (grams)** | 2390 (1825, 2837.5) | 1935 (665, 2582.5) | 2560 (2130,  2915) | **< 0.05** |
| **NICU admission** | 72 (34.6%) | 43 (58.1%) | 29 (21.6%) | **< 0.05** |
| **NICU length of stay (days)** | 25.5 (11, 99) | 55 (18, 114) | 14 (4, 81.5) | 0.10 |
| **Neonatal survival to discharge without morbidity†** | 86 (41.3%) | 17 (23.9%) | 69 (53.9%) | **< 0.05** |
| ANOVA or Kruskal Wallis tests were used to compare parametric and non-parametric continuous variables, respectively. Chi-square test was performed to compare quantitative variables.  *NICU (neonatal intensive care unit)*  † Neonatal survival to hospital discharge includes neonates that were alive at the time of hospital discharge and were not assigned any of the diagnoses contained within the adverse neonatal outcome composite: hypoglycemia, hypothermia, intraventricular hemorrhage, necrotizing enterocolitis, respiratory distress syndrome, hyperbilirubinemia, hypocalcemia, seizures, and sepsis. | | | | |
