# Supplementary material for: Sonographic Surveillance and Perinatal Outcomes Among Pregnancies with Periviable Fetal Growth Restriction
Source: Research Square preprint supplement (doi:10.21203/rs.3.rs-5769809/v1), 2025-01-23
Supplement: Supplementary file 3 [file 7eb693bb7bf4a3df27fae081.docx]

| **Supplementary Table 3.** Comparison of secondary outcomes among this study’s population to rates reported in previously published studies. | | |
| --- | --- | --- |
|  | **All** | **Prior studies** |
| **Neonatal outcome composite** | 83 (39.9%) | 20-50% 21, 26 |
| IVH | 6 (2.9%) | 1-5% 20, 21, 26, 27 |
| NEC | 0 | 0-5.6% 20, 21, 26, 27 |
| RDS | 44 (21.2%) | 19-34% 20, 21, 26, 27 |
| Sepsis | 10 (4.8%) | 7.5-36% 20, 21, 26, 27 |
| **Obstetric outcome composite** |  |  |
| HDP | 73 (32.6%) | 11-54% 20, 21, 26, 28, 30 † |
| Placental abruption | 6 (2.7%) | 2% 30 |
| PTD | 78 (34.8%) | 22.5-74% 20, 21, 23‡ |
| *Abbreviations: IVH (intraventricular hemorrhage); NEC (necrotizing enterocolitis); RDS (respiratory distress syndrome); HDP (hypertensive disorder of pregnancy); PTD (preterm delivery)*  †Mendoza et al (2021) report on the rate of pregnancies electively delivered for the indication of preeclampsia.  ‡ Li et al (2014) report on the rate of pregnancies delivered prior to 34 weeks. Meler et al (2023) report on the rate of pregnancies delivered prior to 32 weeks. | | |
